# Supplementary material for: Therapeutic Delivery of Soluble Fractalkine Ameliorates Vascular Dysfunction in the Diabetic Retina
Source: MDPI journal article supplement (doi:10.3390/ijms25031727), 2024-01-31
Supplement: s1 [file s1]

## Supplementary Figures and Figure Legends

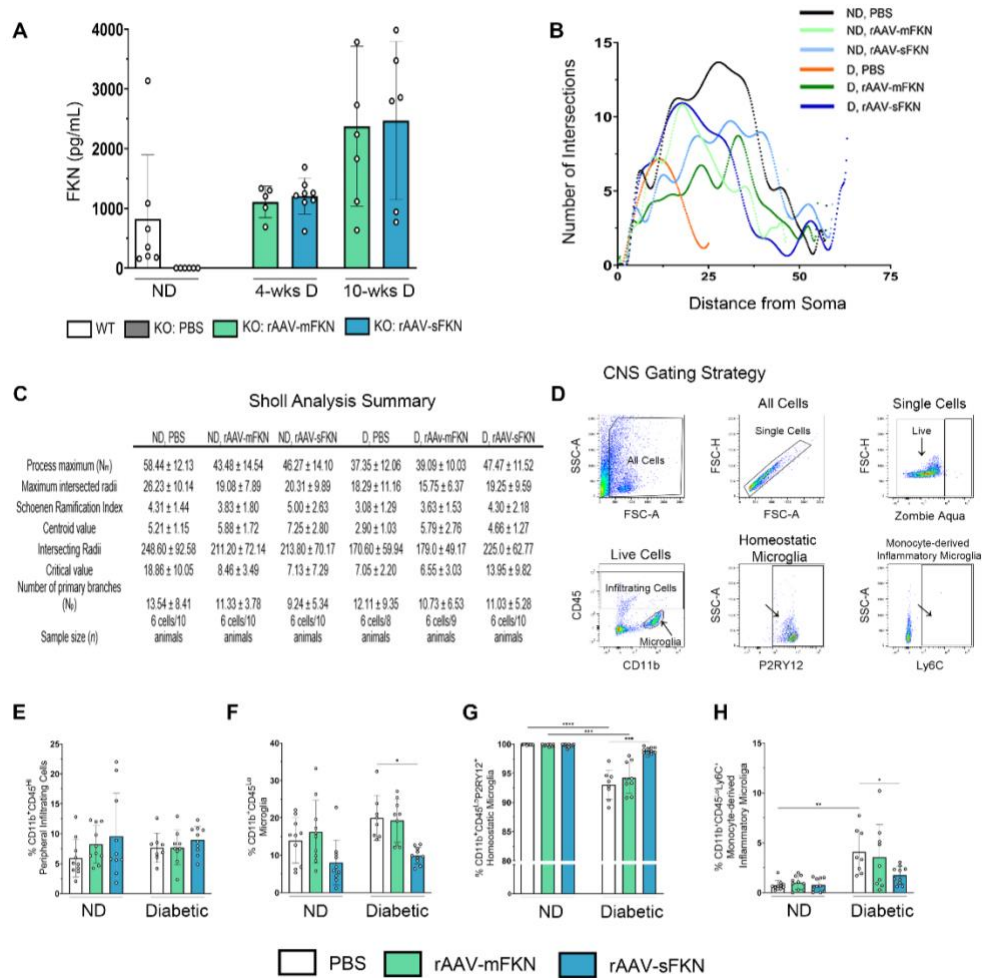

**Figure S1.** rAAV-sFKN shifts microglia towards a homeostatic phenotype. **(A)** Quantification of FKN (pg/mL) by ELISA in ND wild-type (WT) and PBS-treated FKN<sup>KO</sup>, 4-weeks diabetic and 10-weeks diabetic mice treated with rAAV-mFKN (green bars) or rAAV-sFKN (blue bars). This data shows the characterization of the diabetic model using FKN<sup>KO</sup> mice and rAAV expressing mFKN or sFKN, currently under peer-review in another peer review journal. **(B-C)** Microglia homeostatic morphology in the retina is noted by extended processes intersecting successive concentric circles relative to the distance of the cell body was represented in a Sholl analysis plot **(B)** and Sholl analysis data summary **(C)**. **(D)** Gating strategy to identify CD11b<sup>+</sup>CD45<sup>Lo</sup> microglia in brain and spinal cord tissues, CD11b<sup>+</sup>CD45<sup>Hi</sup> infiltrating cells, CD11b<sup>+</sup>CD45<sup>Lo</sup>P2RY12<sup>+</sup> homeostatic microglia, and CD11b<sup>+</sup>CD45<sup>Lo</sup>Ly6C<sup>+</sup> **monocyte-derived inflammatory** microglia. **(E-H)** Graphical representation of flow cytometric quantification of CD11b<sup>+</sup>CD45<sup>Hi</sup> infiltrating cells in brain and spinal cord tissues **(E)**, CD11b<sup>+</sup>CD45<sup>Lo</sup> microglia **(F)**, CD11b<sup>+</sup>CD45<sup>Lo</sup>P2RY12<sup>+</sup> homeostatic microglia **(G)**, and CD11b<sup>+</sup>CD45<sup>Lo</sup>Ly6C<sup>+</sup> **monocyte-derived inflammatory** microglia **(H)**. Data is shown as mean ± SD, *n* = 8-10 mice per group where each data point represents an individual mouse. \**p* < 0.05, \*\**p* < 0.01, \*\*\**p* < 0.001 and \*\*\*\**p* < 0.0001 using one-way ANOVA, Kruskal-Wallis

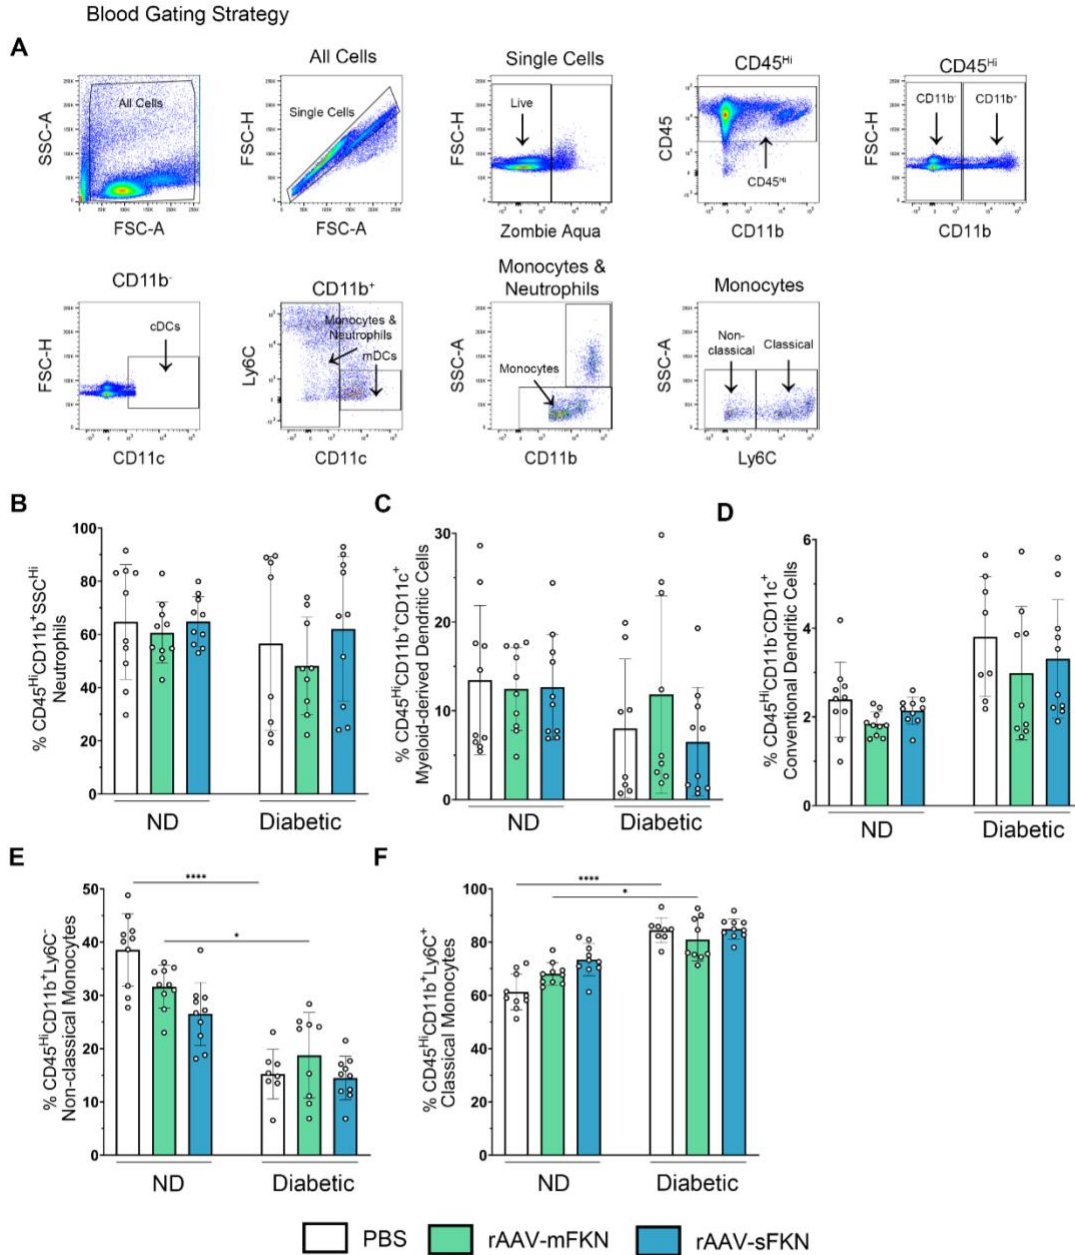

**Figure S2.** rAAVs do not alter the peripheral immune cells in blood tissue. **(A)** Gating strategy to identify CD45<sup>Hi</sup>CD11b<sup>+</sup>SSC<sup>Hi</sup> neutrophils, CD45<sup>Hi</sup>CD11b<sup>+</sup>Ly6C<sup>-</sup> non-classical monocytes, CD45<sup>Hi</sup>CD11b<sup>+</sup>Ly6C<sup>+</sup> classical monocytes, CD45<sup>Hi</sup>CD11b<sup>+</sup>CD11c<sup>+</sup> myeloid-derived dendritic cells, and CD45<sup>Hi</sup>CD11b<sup>+</sup>CD11c<sup>-</sup> conventional dendritic cells in blood leukocytes. **(B-E)** Graphical representation of flow cytometric quantification of CD45<sup>Hi</sup>CD11b<sup>+</sup>SSC<sup>Hi</sup> neutrophils **(B)**, CD45<sup>Hi</sup>CD11b<sup>+</sup>CD11c<sup>+</sup> myeloid-derived dendritic cells **(C)**, CD45<sup>Hi</sup>CD11b<sup>+</sup>CD11c<sup>-</sup> conventional dendritic cells **(D)**, CD45<sup>Hi</sup>CD11b<sup>+</sup>Ly6C<sup>-</sup> non-classical monocytes **(E)**, CD45<sup>Hi</sup>CD11b<sup>+</sup>Ly6C<sup>+</sup> classical monocytes **(F)**. Data is shown as mean  $\pm$  SD,  $n = 8-10$  mice per group where each data point represents an individual mouse. \* $p < 0.05$  and \*\*\*\* $p < 0.0001$  using one-way ANOVA, Kruskal-Wallis test.

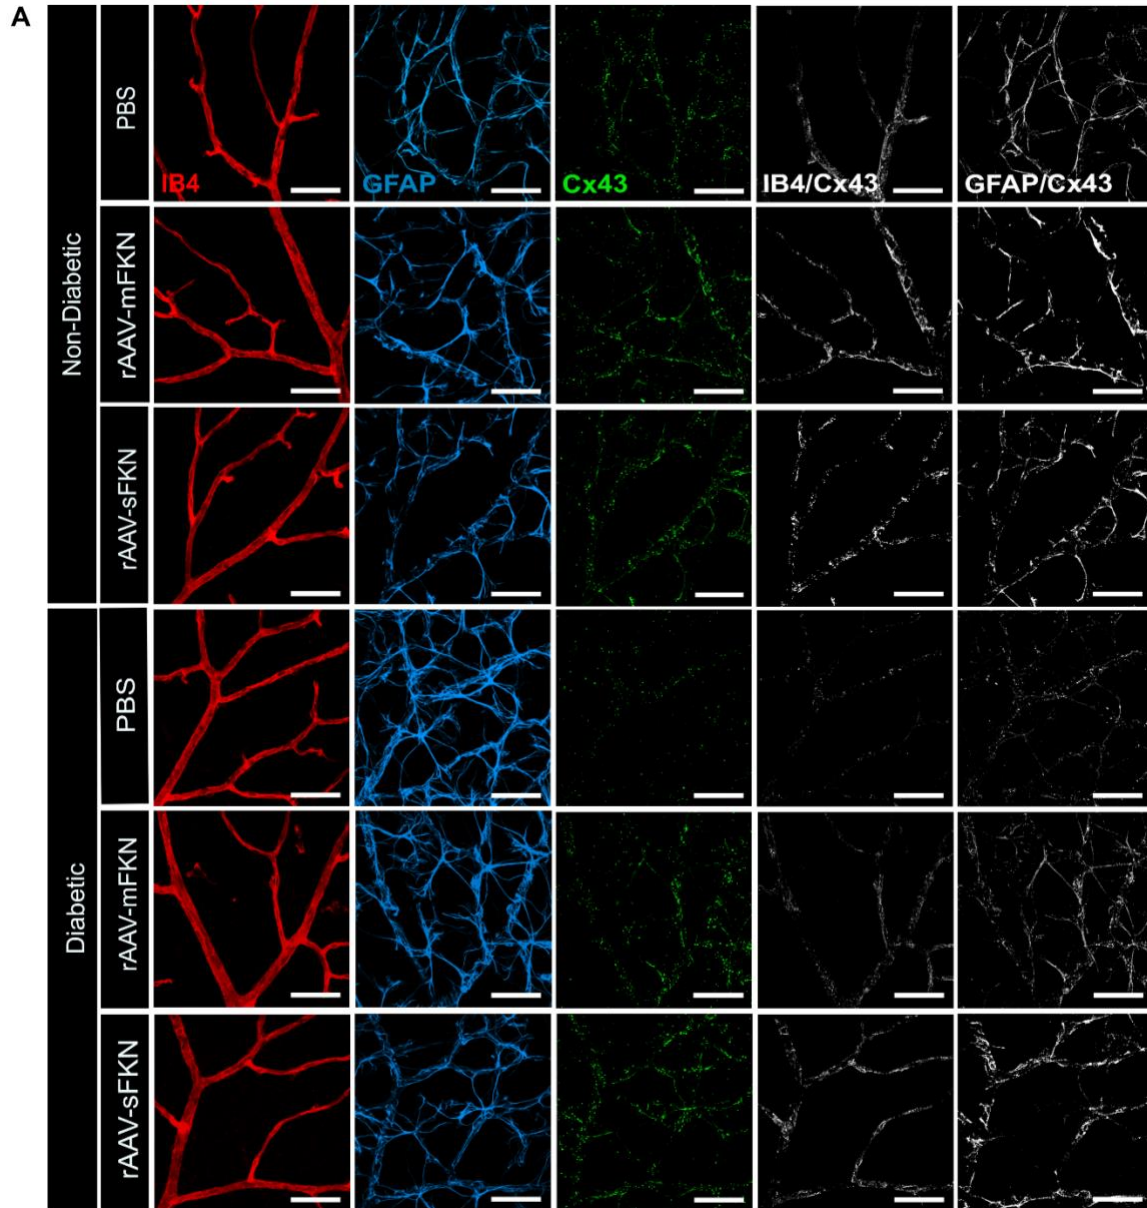

**Figure S3.** Gap-junction distribution in endothelial cells and astrocytes is increased with rAAV-sFKN. **(A)** Confocal images of retinal tissues stained for IB4 (red), GFAP (blue), Cx43 (green), and double immunofluorescence colocalized regions for IB4/Cx43 and GFAP/Cx43 (white) using Imaris software.



A

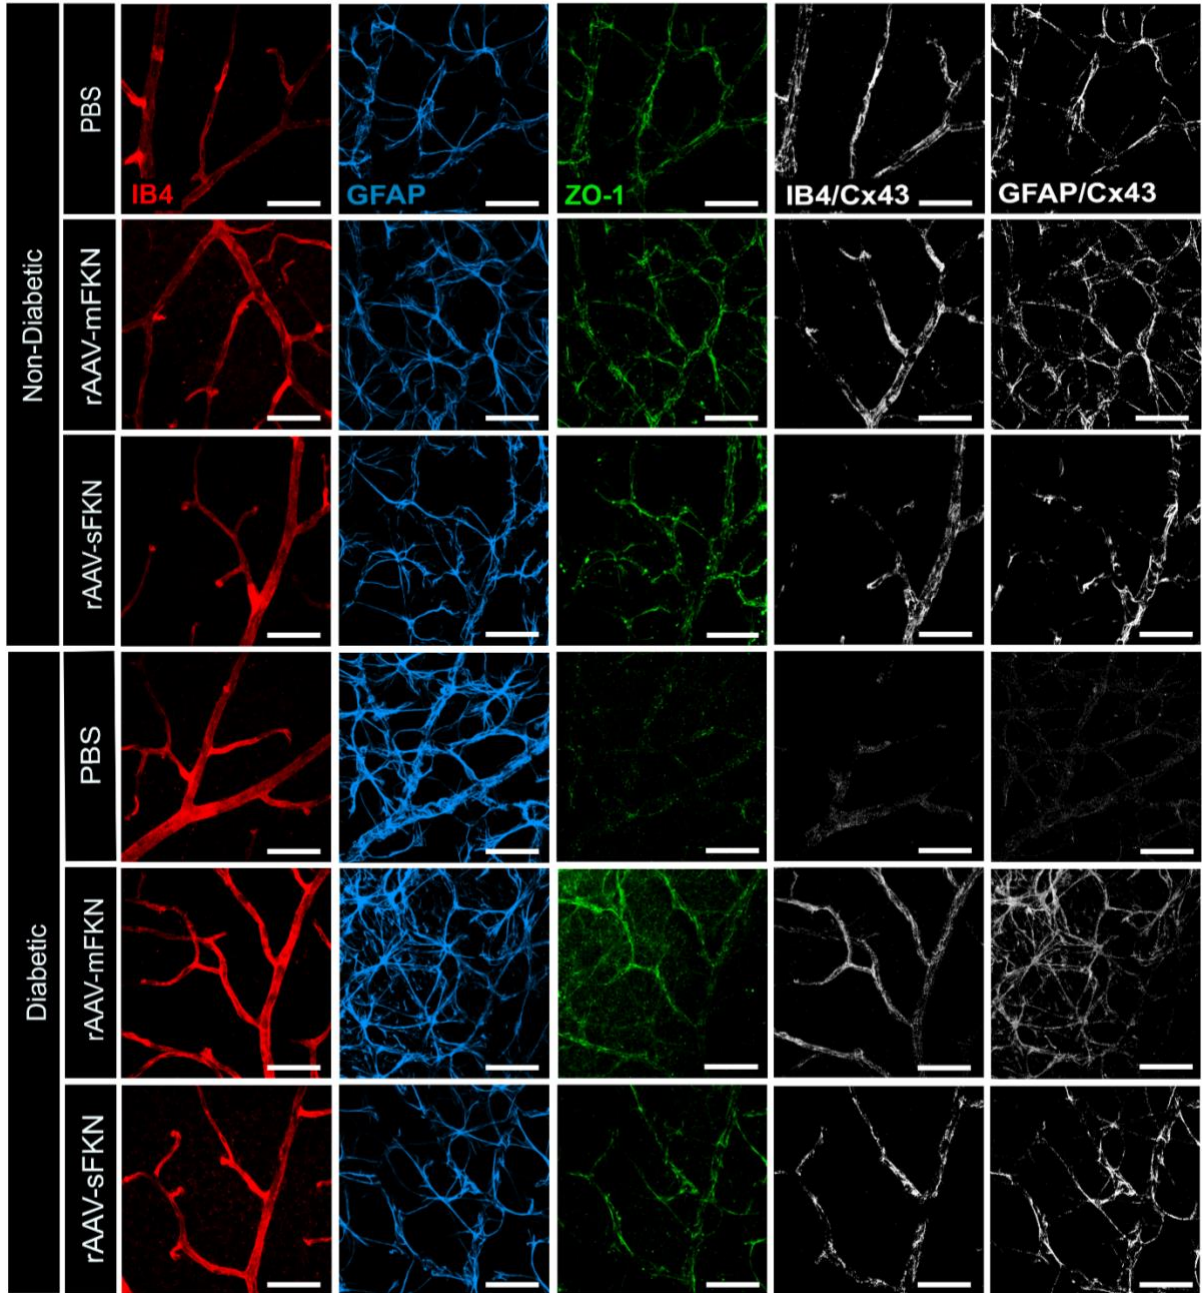

**Figure S4.** sFKN or mFKN treatment contributes to increased tight-junction distribution in endothelial cells and astrocytes. (A) Confocal images of retinal tissues stained for IB4 (red), GFAP (blue), ZO-1 (green), and double immunofluorescence colocalized regions for IB4/ZO-1 and GFAP/ZO-1 (white) using Imaris software.

## Supplementary Tables

**Supplementary Table 1. Antibodies for immunohistochemistry analysis**

| Target antigen (Clone)                                                   | Company                                  | RRID       | Dilution |
|--------------------------------------------------------------------------|------------------------------------------|------------|----------|
| <b>Primary antibodies</b>                                                |                                          |            |          |
| Rabbit anti-ionized calcium binding adaptor molecule-1 (Iba1)            | FUJIFILM-Wako                            | AB_839504  | 1:3000   |
| Mouse anti-neuronal nuclei (NeuN)                                        | Millipore                                | AB_2298772 | 1:4000   |
| Guinea Pig anti RNA-binding protein with multiple splicing (RBPMS)       |                                          | AB_2687403 | 1:500    |
| Rat anti-glial fibrillary acidic protein (GFAP)                          | Invitrogen                               | AB_2532994 | 1:4000   |
| Biotinylated Griffonia Simplicifolia Lectin I (GSL I) Isolectin B4 (IB4) | Vector Laboratories                      | AB_2314661 | 1:100    |
| Rabbit anti-fibrinogen                                                   | Agilent                                  | AB_578481  | 1:2000   |
| Rabbit anti-zonula occludens-1 (ZO-1)                                    | Invitrogen                               | AB_2533456 | 1:500    |
| Rabbit anti-connexin 43 (Cx43)                                           | Sigma-Aldrich                            | AB_476857  | 1:1000   |
| Rat anti-platelet endothelial cell adhesion molecule (PECAM-1/CD31)      | BD Biosciences                           | AB_393571  | 1:500    |
| <b>Secondary antibodies</b>                                              |                                          |            |          |
| Goat anti-mouse Cy3                                                      | Jackson ImmunoResearch Laboratories, Inc | AB_2338709 | 1:1000   |
| Goat anti-rabbit 488                                                     |                                          | AB_2338058 | 1:1000   |
| Donkey anti-guinea pig Cy3                                               |                                          | AB_2340460 | 1:1000   |
| Goat anti-rat AlexaFluor 647                                             |                                          | AB_2338394 | 1:1000   |
| Goat anti-rabbit Cy3                                                     |                                          | AB_2338006 | 1:1000   |
| Donkey anti-rat Alexa Fluor 488                                          |                                          | AB_2340684 | 1:1000   |
| Streptavidin Cy5                                                         |                                          | AB_2337245 | 1:1000   |

**Supplementary Table 2. Combination of antibodies used for analysis**

| Target antigen | Primary antibody        | Secondary antibody             |
|----------------|-------------------------|--------------------------------|
| Iba1           | Rabbit anti-Iba1        | Goat anti-rabbit 488           |
| NeuN           | Mouse anti-NeuN         | Goat anti-mouse Cy3            |
| RBPMS          | Mouse anti-RBPMS        | Donkey anti-guinea pig Cy3     |
| GFAP           | Rat anti-GFAP           | Donkey anti-rat AlexaFluor 488 |
| CD31           | Rat anti-CD31           | Goat anti-rat AlexaFluor 647   |
| Fibrinogen     | Rabbit anti-fibrinogen  | Goat anti-rabbit Cy3           |
| IB4            | Biotin IB4              | Streptavidin Cy5               |
| ZO-1           | Rabbit anti-ZO-1        | Goat anti-rabbit Cy3           |
| Cx43           | Rabbit anti-connexin 43 | Goat anti-rabbit Cy3           |

**Supplementary Table 3. Antibodies for flow cytometry analysis**

| <b>Target antigen (Clone)</b> | <b>Company</b> | <b>RRID</b> | <b>Dilution</b> |
|-------------------------------|----------------|-------------|-----------------|
| CD11b PE-CF594 (M1/70)        | BD Bioscience  | AB_11154422 | 1:100           |
| CD45 Pacific Blue (30-F11)    | Invitrogen     | AB_1518806  | 1:100           |
| CD11c PE-Cy7 (N418)           |                | AB_465552   | 1:50            |
| P2RY12 APC (S16007D)          | Biolegend      | AB_2721469  | 1:100           |
| Ly6C PE (HK1.4)               |                | AB_1186132  | 1:30            |
